# Supplementary material for: Exploring the potential of MB 2 MBene family as promising anodes for Li-ion batteries
Source: Royal Society of Chemistry journal article supplement (doi:10.1039/d4ra00287c), 2024-01-01
Supplement: d4ra00287c1.pdf [file d4ra00287c1.pdf]

**Supplemental Material for “Exploring the potential of MB<sub>2</sub> MBene family as promising anodes for Li-ion batteries”**

Ying Han<sup>a</sup>, Lianli Wang<sup>a\*</sup>, Bin. Zheng<sup>a</sup>, Jinlei Wang<sup>a</sup>, Li Zhang<sup>a</sup>, Beibei Xiao<sup>b</sup>

<sup>a</sup>*School of Materials Science and Engineering, Xi'an University of Science and Technology, Xi'an 710054, PR China*

<sup>b</sup>*School of Energy and Power Engineering, Jiangsu University of Science and Technology, Zhenjiang, Jiangsu, 212003, PR China*

Structural dynamic stability can be used to evaluate the properties of 2D materials. Here, we calculate the phonon spectrum using the finite displacement method. The phonon spectra of CrB<sub>2</sub>, CuB<sub>2</sub>, ZnB<sub>2</sub>, YB<sub>2</sub> and NiB<sub>2</sub> have more virtual frequencies and are not suitable for use as negative electrode materials for LIBs. The phonon spectrum of TiB<sub>2</sub>, VB<sub>2</sub>, HfB<sub>2</sub> and NbB<sub>2</sub> is calculated, and there is no virtual frequency in the phonon spectrum curve. The dynamic stability of these four materials was proved.<sup>1</sup> FeB<sub>2</sub> and MnB<sub>2</sub> have previously been reported as anode materials for LIBs.<sup>2, 3</sup> CoB<sub>2</sub> and ZrB<sub>2</sub> are distorted in the optimization process, and their structures are easy to collapse, which are not suitable for the LIBs anode materials. Therefore, we won't conduct additional calculations for FeB<sub>2</sub>, MnB<sub>2</sub>, CoB<sub>2</sub> and ZrB<sub>2</sub>.

In order to better understand the electronic properties of the MB<sub>2</sub> monolayer, we calculated the band structure of MB<sub>2</sub> monolayer. The ScB<sub>2</sub>, TiB<sub>2</sub>, VB<sub>2</sub>, NbB<sub>2</sub>, MoB<sub>2</sub> and WB<sub>2</sub> monolayers exhibit metallicity due to the Fermi energy level crossing the valence band (Fig. S6). Their Dirac cones lying above the Fermi level suggest their potential for experimental preparation. As shown in Fig. S6(g), the band structure of HfB<sub>2</sub> exhibits non-metallic properties and is not suitable for LIBs electrode materials.

---

\* Corresponding author E-mail: [wanglianli@xust.edu.cn](mailto:wanglianli@xust.edu.cn)

**Table S1** The “Layer thickness” represents the distance between the B-layer and the M-layer.

| <b>MBenes</b>    | <b>Layer thickness(Å)</b> |
|------------------|---------------------------|
| ScB <sub>2</sub> | 1.409                     |
| YB <sub>2</sub>  | 1.682                     |
| TiB <sub>2</sub> | 1.189                     |
| ZrB <sub>2</sub> | 0.079                     |
| HfB <sub>2</sub> | 1.348                     |
| VB <sub>2</sub>  | 0.997                     |
| NbB <sub>2</sub> | 1.738                     |
| TaB <sub>2</sub> | 1.466                     |
| CrB <sub>2</sub> | 0.878                     |
| MoB <sub>2</sub> | 1.574                     |
| WB <sub>2</sub>  | 1.607                     |
| MnB <sub>2</sub> | 0.739                     |
| FeB <sub>2</sub> | 0.625                     |
| CoB <sub>2</sub> | 0.433                     |
| NiB <sub>2</sub> | 0.995                     |
| CuB <sub>2</sub> | 1.055                     |
| ZnB <sub>2</sub> | 1.730                     |

**Table S2** The corresponding adsorption energy of Li atom at different optimal sites on the surface of MBenes (Unit: eV)

| MBenes           | Site 1 | Site 2 | Site 3                | Site 4 | Site 5 | Site 6                |
|------------------|--------|--------|-----------------------|--------|--------|-----------------------|
| ScB <sub>2</sub> | -1.87  | -1.00  | -1.09                 | -0.17  | -0.29  | -0.27                 |
| TiB <sub>2</sub> | -0.92  | -0.08  | -0.14                 | 0.207  | 0.06   | 0.07                  |
| VB <sub>2</sub>  | -0.77  | 0.02   | 0.01                  | -0.10  | -0.32  | -0.31                 |
| CrB <sub>2</sub> | -0.87  | 0.18   | 0.20                  | 0.01   | -0.21  | -0.20                 |
| MnB <sub>2</sub> | -0.11  | -0.02  | 0.01                  | -0.43  | -0.80  | -0.84(move to site 5) |
| FeB <sub>2</sub> | 0.22   | 0.22   | 0.29                  | -0.28  | -0.63  | -0.57                 |
| CuB <sub>2</sub> | -2.16  | -1.33  | -2.11                 | 0.36   | -0.31  | -0.19                 |
| ZnB <sub>2</sub> | -1.74  | -1.26  | -1.74(move to site 1) | -0.29  | -0.48  | -0.48                 |
| YB <sub>2</sub>  | -2.10  | -2.07  | -2.10                 | -0.12  | -0.19  | -0.18                 |
| NbB <sub>2</sub> | -1.01  | -0.23  | -0.28                 | 0.84   | 0.79   | 0.77                  |
| MoB <sub>2</sub> | -2.30  | -1.60  | -2.31(move to site 1) | -0.85  | -1.01  | -0.99                 |
| HfB <sub>2</sub> | -1.71  | -0.83  | -1.71(move to site 1) | -0.30  | -0.48  | -0.46                 |
| TaB <sub>2</sub> | -2.25  | -1.38  | -2.24                 | -0.86  | -0.96  | -0.95                 |
| WB <sub>2</sub>  | -1.96  | -1.24  | -1.96(move to site 1) | -0.62  | -0.86  | -0.83                 |

**Table S3** The amount of charge transfer of the Li, B, and M atoms at the most stable adsorption position of the Li atom is determined by Bader charge analysis. (M=Sc, Ti, V, Cr, Mn, Fe and Cu)

| $\Delta Q(e)/\text{atom}$ | ScB <sub>2</sub> | TiB <sub>2</sub> | VB <sub>2</sub> | CrB <sub>2</sub> | MnB <sub>2</sub> | FeB <sub>2</sub> | CuB <sub>2</sub> |
|---------------------------|------------------|------------------|-----------------|------------------|------------------|------------------|------------------|
| <b>M1</b>                 | -1.037           | -1.028           | -0.900          | -0.694           | -0.375           | -0.119           | -0.300           |
| <b>M2</b>                 | -1.040           | -1.034           | -0.897          | -0.700           | -0.376           | -0.121           | -0.296           |
| <b>M3</b>                 | -1.040           | -1.036           | -0.897          | -0.701           | -0.375           | -0.122           | -0.296           |
| <b>M4</b>                 | -0.852           | -0.979           | -0.855          | -0.671           | -0.312           | -0.027           | -0.305           |
| <b>B1</b>                 | 0.537            | 0.596            | 0.519           | 0.456            | 0.420            | 0.137            | 0.326            |
| <b>B2</b>                 | 0.612            | 0.692            | 0.482           | 0.369            | 0.281            | 0.201            | 0.241            |
| <b>B3</b>                 | 0.674            | 0.605            | 0.602           | 0.467            | 0.410            | 0.267            | 0.170            |
| <b>B4</b>                 | 0.584            | 0.660            | 0.576           | 0.422            | 0.116            | 0.022            | 0.203            |
| <b>B5</b>                 | 0.626            | 0.659            | 0.570           | 0.423            | 0.138            | 0.021            | 0.279            |
| <b>B6</b>                 | 0.651            | 0.511            | 0.639           | 0.465            | 0.339            | 0.269            | 0.169            |
| <b>B7</b>                 | 0.534            | 0.600            | 0.518           | 0.548            | 0.340            | 0.140            | 0.405            |
| <b>B8</b>                 | 0.591            | 0.599            | 0.483           | 0.456            | 0.261            | 0.205            | 0.244            |
| <b>Li</b>                 | -0.840           | -0.845           | -0.841          | -0.838           | -0.866           | -0.874           | -0.840           |

**Table S4** The amount of charge transfer of the Li, B, and M atoms at the most stable adsorption position of the Li atom is determined by Bader charge analysis. (M=Zn, Y, Nb, Mo, Hf, Ta and W)

| $\Delta Q(e)/\text{atom}$ | ZnB <sub>2</sub> | YB <sub>2</sub> | NbB <sub>2</sub> | MoB <sub>2</sub> | HfB <sub>2</sub> | TaB <sub>2</sub> | WB <sub>2</sub> |
|---------------------------|------------------|-----------------|------------------|------------------|------------------|------------------|-----------------|
| <b>M1</b>                 | -0.327           | -0.929          | -0.616           | -0.442           | -1.031           | -0.730           | -0.501          |
| <b>M2</b>                 | -0.316           | -0.921          | -0.619           | -0.434           | -0.840           | -0.734           | -0.506          |
| <b>M3</b>                 | -0.418           | -0.921          | -0.620           | -0.437           | -1.053           | -0.740           | -0.494          |
| <b>M4</b>                 | -0.401           | -0.701          | -0.564           | -0.414           | -1.060           | -0.686           | -0.479          |
| <b>B1</b>                 | 0.191            | 0.463           | 0.288            | 0.387            | 0.642            | 0.617            | 0.242           |
| <b>B2</b>                 | 0.150            | 0.515           | 0.382            | 0.311            | 0.515            | 0.531            | 0.406           |
| <b>B3</b>                 | 0.513            | 0.662           | 0.380            | 0.208            | 0.598            | 0.470            | 0.402           |
| <b>B4</b>                 | 0.363            | 0.470           | 0.388            | 0.390            | 0.646            | 0.364            | 0.423           |
| <b>B5</b>                 | 0.250            | 0.556           | 0.386            | 0.390            | 0.600            | 0.399            | 0.356           |
| <b>B6</b>                 | 0.295            | 0.651           | 0.383            | 0.293            | 0.604            | 0.505            | 0.421           |
| <b>B7</b>                 | 0.076            | 0.475           | 0.577            | 0.210            | 0.625            | 0.351            | 0.267           |
| <b>B8</b>                 | 0.476            | 0.516           | 0.479            | 0.384            | 0.597            | 0.495            | 0.311           |
| <b>Li</b>                 | -0.851           | -0.837          | -0.843           | -0.845           | -0.843           | -0.842           | -0.849          |

**Table S5** The migration barrier of Li atoms along Path I and Path II. (B side)

| MBenes           | Path II | Path I-1 | Path I-2 |
|------------------|---------|----------|----------|
| ScB <sub>2</sub> | 0.831   | 2.386    | -        |
| TiB <sub>2</sub> | 0.809   | 2.440    | 0.814    |
| VB <sub>2</sub>  | 0.967   | 2.836    | 0.951    |
| CrB <sub>2</sub> | 0.955   | 0.001    | 1.280    |
| MnB <sub>2</sub> | 0.305   | 0.733    | 0.280    |
| FeB <sub>2</sub> | 0.114   | 0.006    | 0.362    |
| CuB <sub>2</sub> | 0.662   | 0.751    | -        |
| ZnB <sub>2</sub> | 0.330   | 0.330    | -        |
| YB <sub>2</sub>  | 0.844   | 3.220    | 0.841    |
| NbB <sub>2</sub> | 0.682   | 2.190    | -        |
| MoB <sub>2</sub> | 0.631   | 2.145    | -        |
| HfB <sub>2</sub> | 0.903   | 2.689    | 0.902    |
| TaB <sub>2</sub> | 0.732   | 2.351    | -        |
| WB <sub>2</sub>  | 0.604   | 2.211    | -        |

The “-” is means no transition state is found.

**Table S6** The migration barrier of Li atoms along Path III and Path IV. (Metal side)

| <b>MBenes</b>          | <b>Path IV</b> | <b>Path III-1</b> | <b>Path III-2</b> |
|------------------------|----------------|-------------------|-------------------|
| <b>ScB<sub>2</sub></b> | 0.042          | 0.020             | 0.073             |
| <b>TiB<sub>2</sub></b> | 0.029          | 0.037             | -                 |
| <b>VB<sub>2</sub></b>  | 0.028          | 0.337             | 0.048             |
| <b>CrB<sub>2</sub></b> | 0.001          | 0.151             | -                 |
| <b>MnB<sub>2</sub></b> | 0.001          | 0.603             | -                 |
| <b>FeB<sub>2</sub></b> | 0.052          | 0.773             | 0.070             |
| <b>CuB<sub>2</sub></b> | 0.044          | 0.449             | 0.006             |
| <b>ZnB<sub>2</sub></b> | 0.029          | 0.451             | 0.032             |
| <b>YB<sub>2</sub></b>  | 0.014          | 0.026             | 0.117             |
| <b>NbB<sub>2</sub></b> | 0.011          | 0.120             | 0.070             |
| <b>MoB<sub>2</sub></b> | 0.029          | 0.076             | 0.030             |
| <b>HfB<sub>2</sub></b> | 0.135          | 0.051             | 0.018             |
| <b>TaB<sub>2</sub></b> | 0.130          | 0.134             | 0.117             |
| <b>WB<sub>2</sub></b>  | 0.029          | 0.083             | 0.044             |

The “-” is means no transition state is found.

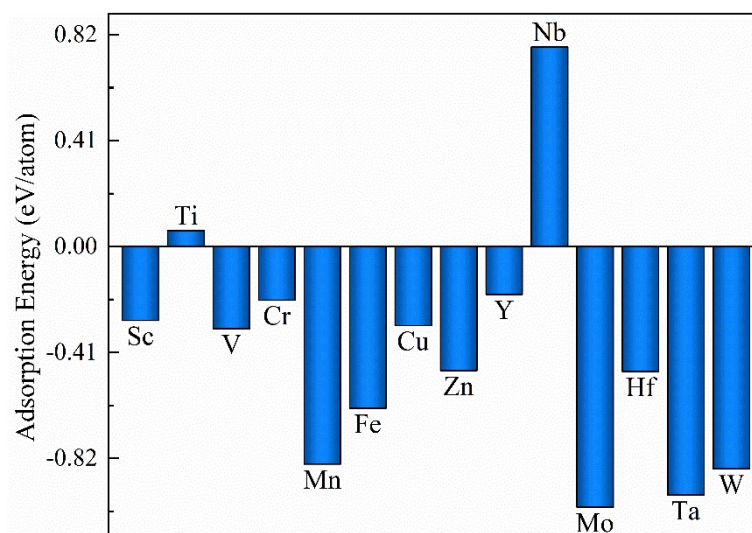

**Fig. S1** The adsorption energy of Li atom on metal side of MB<sub>2</sub> monolayers.

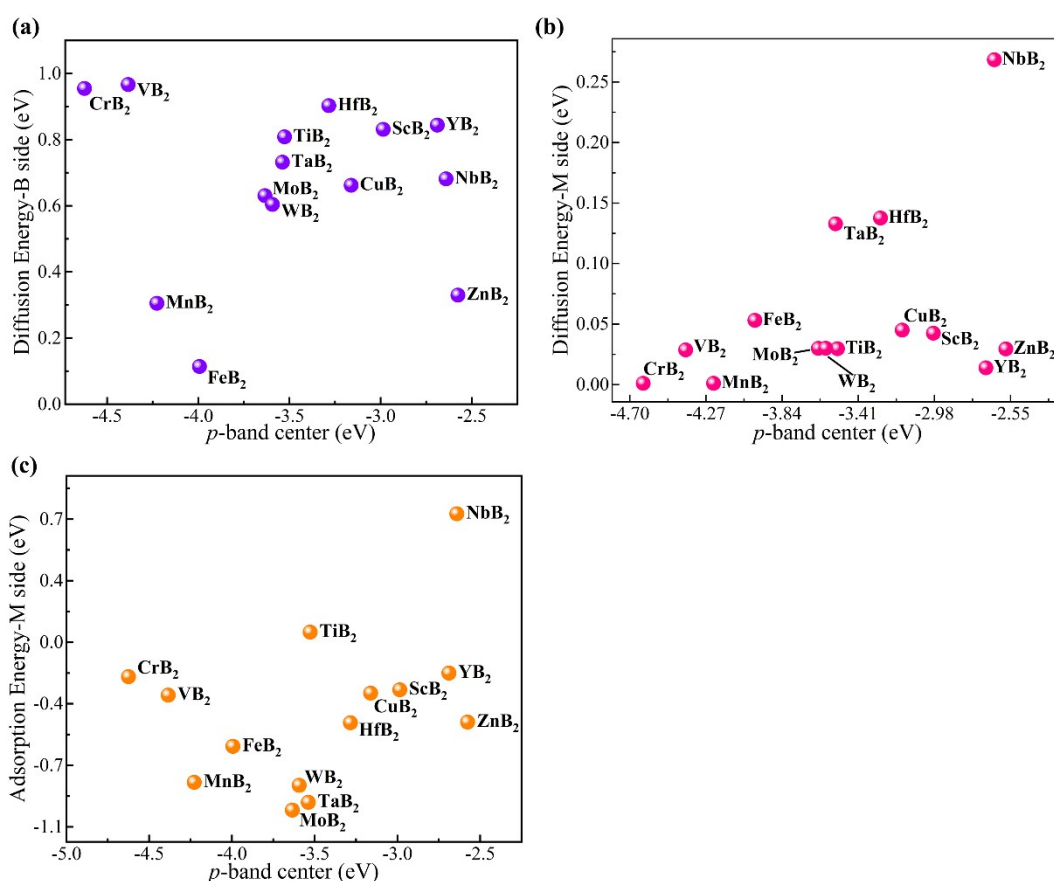

**Fig. S2** The relationship between the *p*-band center and (a) the migration energy barrier of Li atom on the B atomic side and (b) the migration energy barrier and (c) the adsorption energy of Li atom on the metal side of MB<sub>2</sub> monolayer.

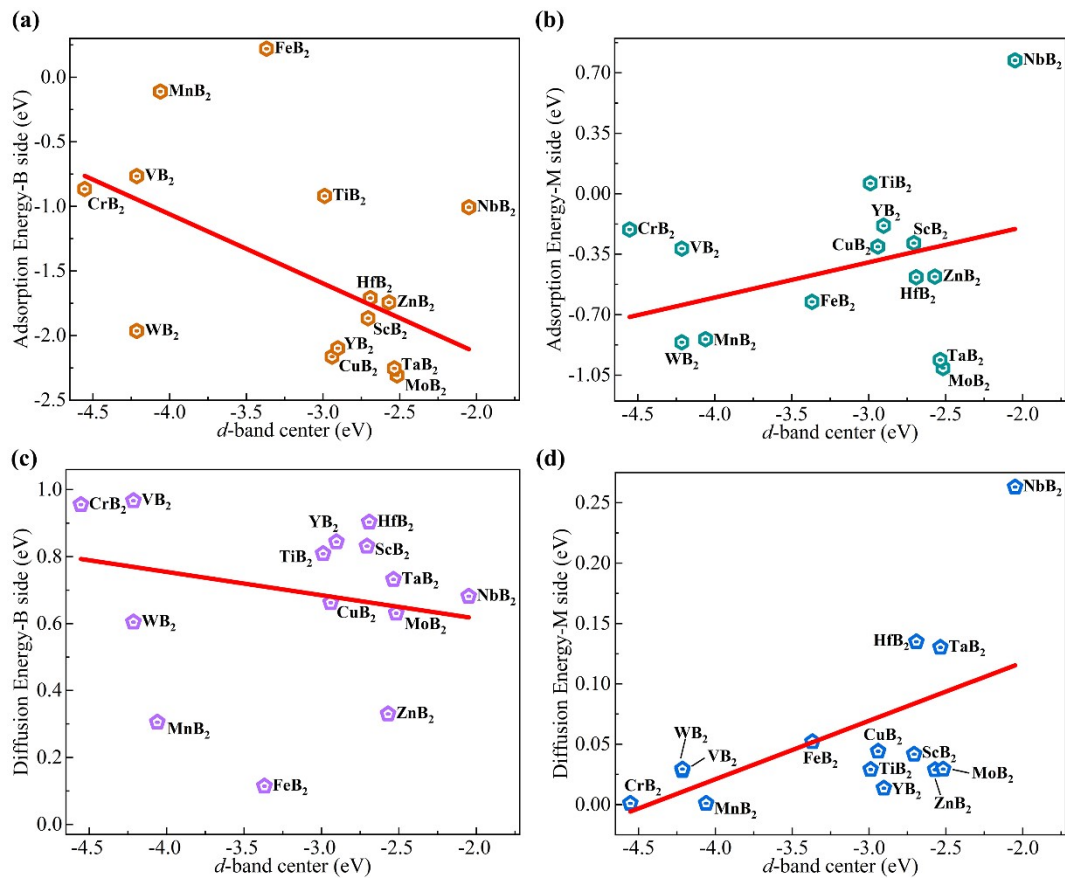

**Fig. S3** The relationship between the  $d$ -band center and the adsorption energy on the (a) B / (b) metal side and the migration energy barrier on the (c) B/ (d) metal side of  $MB_2$  monolayer.

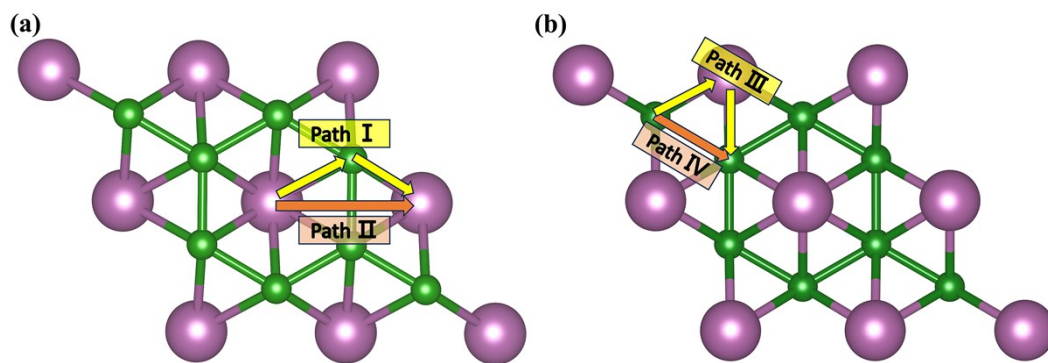

**Fig. S4** Possible diffusion paths of Li atom on (a) B atomic side and (b) metal side of  $MB_2$  monolayer. The purple, orange, and green spheres represent the M, Li, B atoms, respectively.

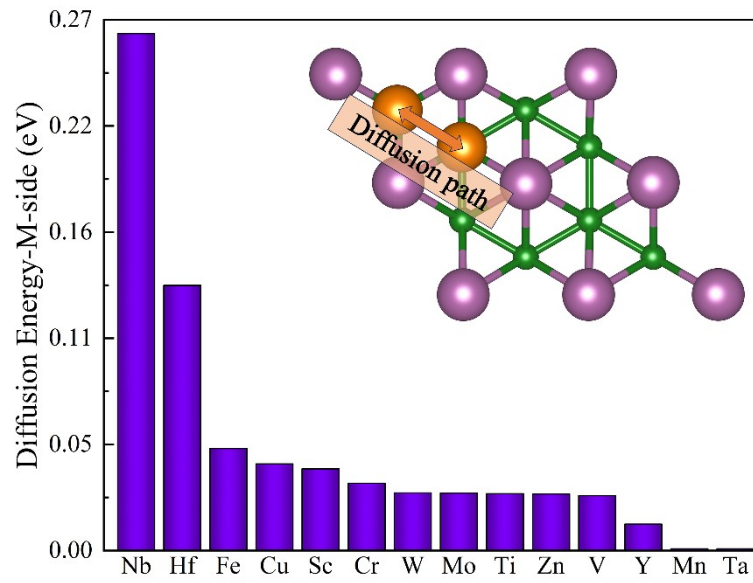

**Fig. S5** Diffusion barrier profiles for Li atom and the diffusion path of Li atom on the metal side of MB<sub>2</sub> monolayer. The purple, orange, and green spheres represent the M, Li, B atoms, respectively.



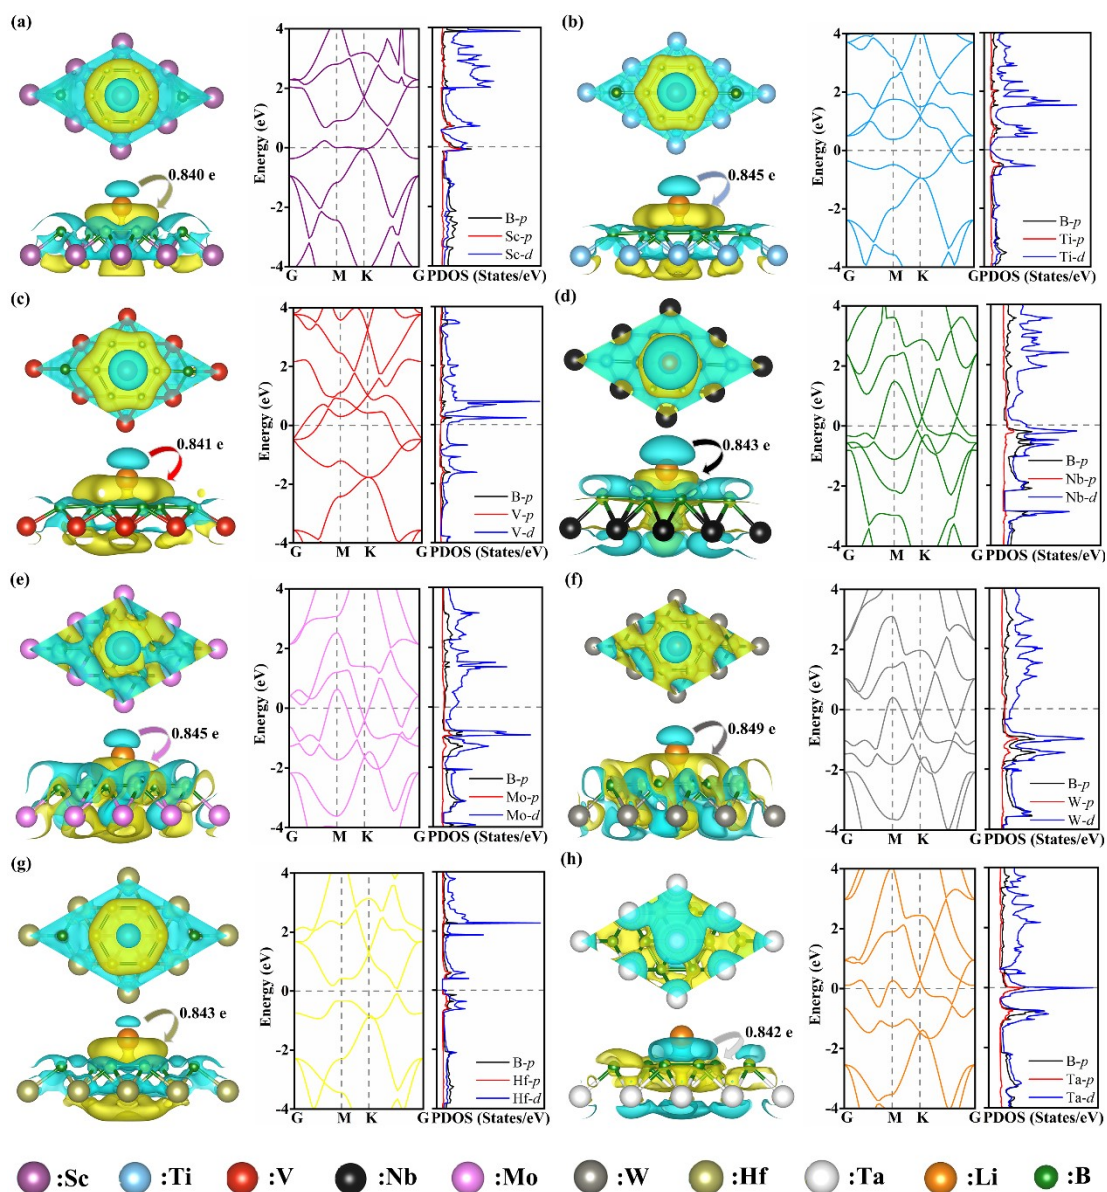

**Fig. S6** Charge density difference, band structure and PDOS of Li atom at the most stable adsorption site on  $MB_2$  surface. ( $M = \text{Sc, Ti, V, Nb, Mo, W, Hf}$  and  $\text{Ta}$ ) The purple, blue, red, black, pink, gray, grass green, white, orange, and green spheres represent Sc, Ti, V, Nb, Mo, W, Hf, Ta, Li and B atoms, respectively.

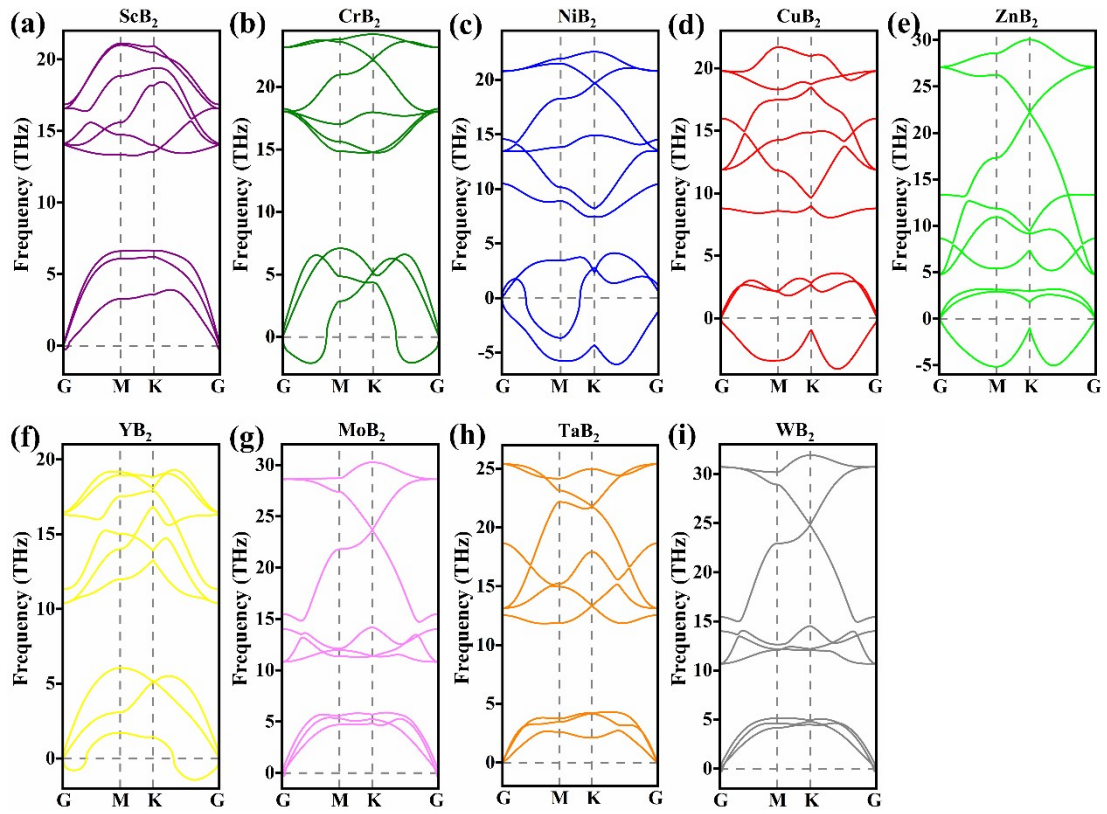

**Fig. S7** The phonon dispersion curves of (a)  $\text{ScB}_2$ , (b)  $\text{CrB}_2$ , (c)  $\text{NiB}_2$ , (d)  $\text{CuB}_2$ , (e)  $\text{ZnB}_2$ , (f)  $\text{YB}_2$ , (g)  $\text{MoB}_2$  (h)  $\text{TaB}_2$  and (i)  $\text{WB}_2$ .

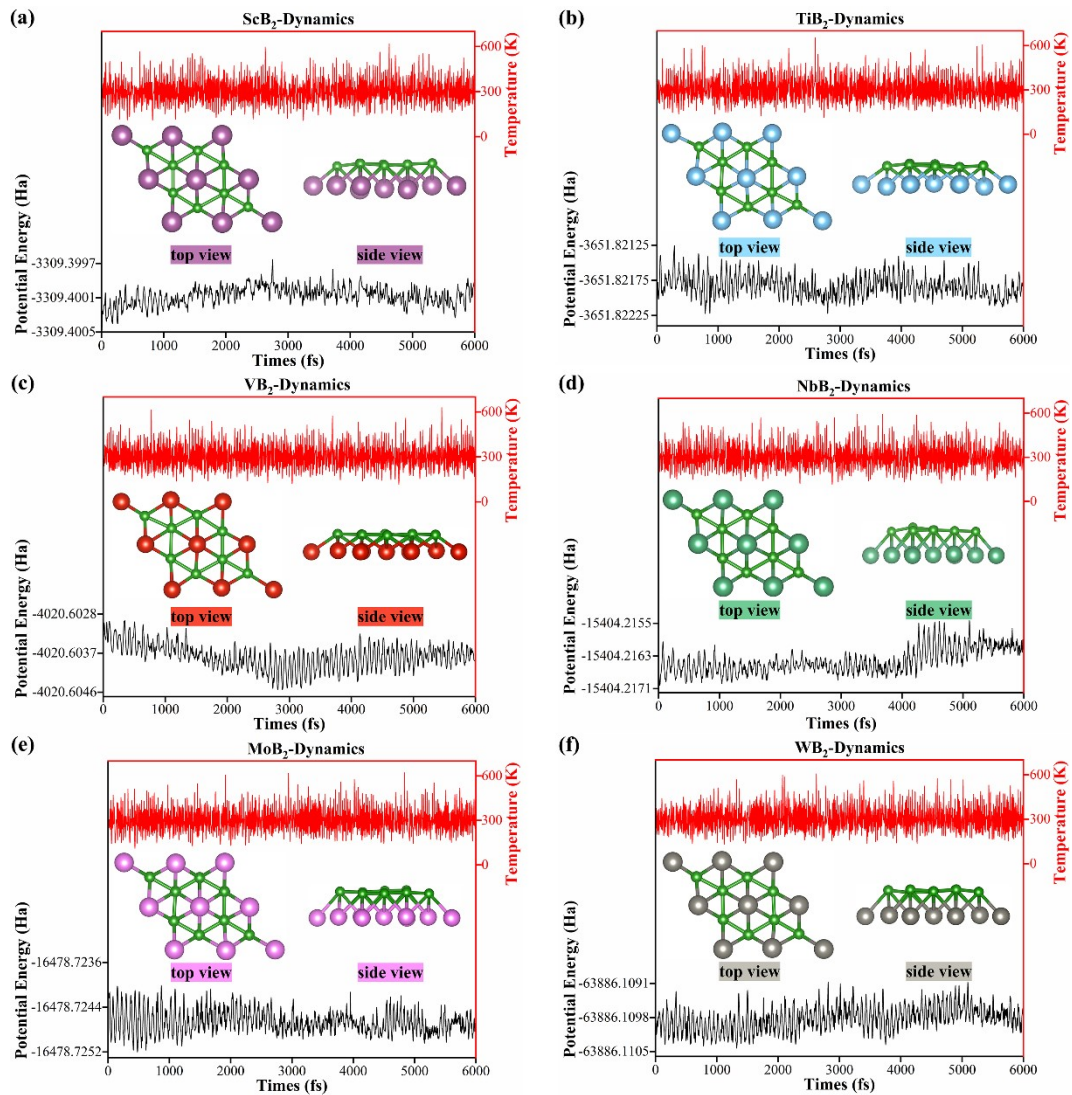

**Fig. S8** (a-f) The potential energies and temperatures of the  $MB_2$  (M=Sc, Ti, V, Nb, Mo and W) monolayer were analyzed via AIMD simulations at 300 K, along with the resultant structural evolution observed over a 6.0 ps duration.

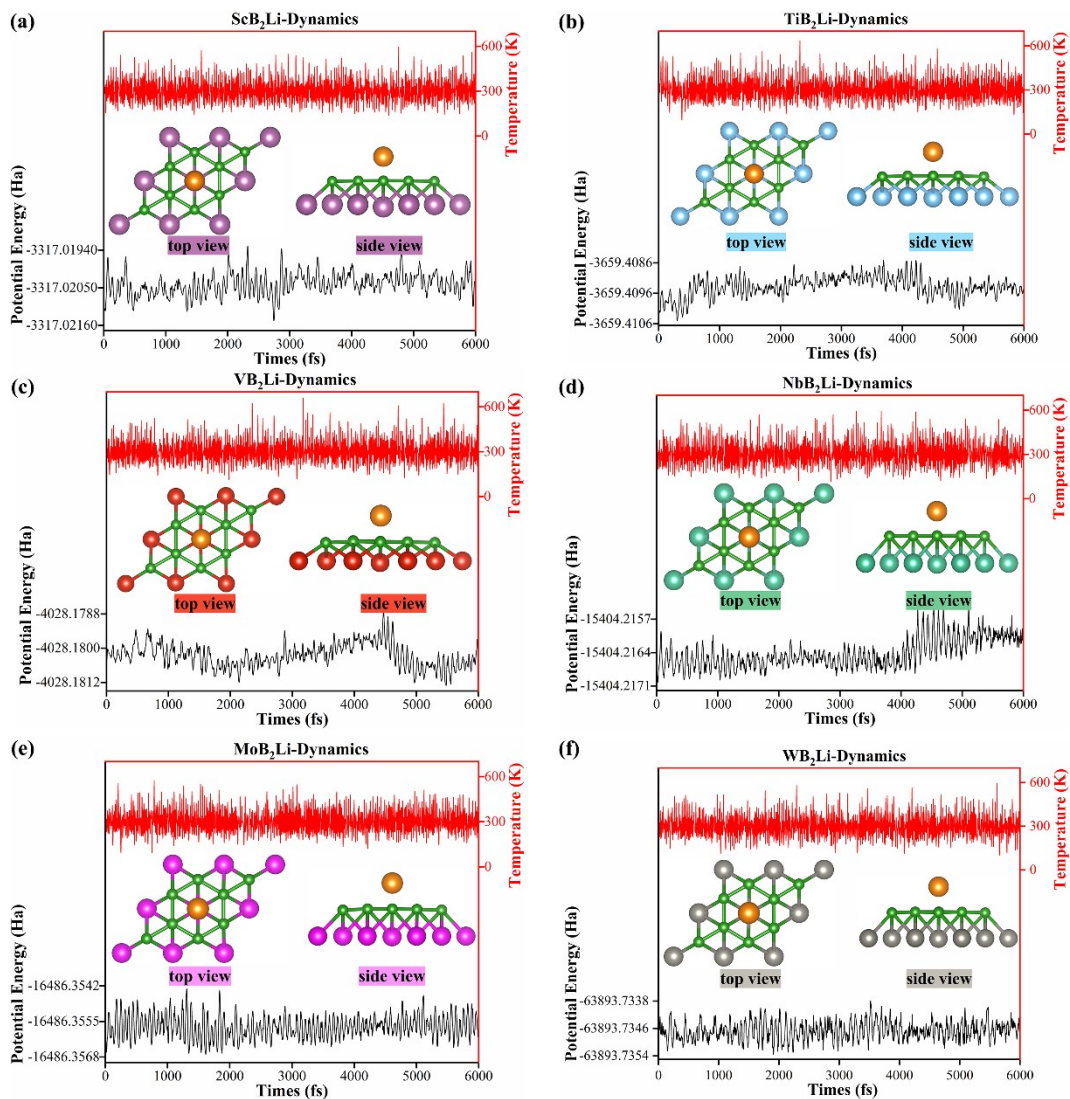

**Fig. S9** (a-f) The potential energy and temperature of  $MB_2$  ( $M = Sc, Ti, V, Nb, Mo$  and  $W$ ) monolayers at 300 K after adsorption of a Li atom were analyzed by AIMD simulation, and the structural evolution observed at 6.0 ps duration was also analyzed.

1. C. Zhang, T. He, S. K. Matta, T. Liao, L. Kou, Z. Chen and A. Du, *The Journal of Physical Chemistry Letters*, 2019, **10**, 2567-2573.
2. S. Luo, J. Zhao, Y. Wang, Y. Zhang, Y. Xiong, N. Ma and J. Fan, *The Journal of Physical Chemistry C*, 2023, **127**, 12484-12491.
3. B. Zhang, L. Fan, J. Hu, J. Gu, B. Wang and Q. Zhang, *Nanoscale*, 2019, **11**, 7857-7865.
